# Supplementary material for: An Efficient and Universal Protoplast Isolation Protocol Suitable for Transient Gene Expression Analysis and Single-Cell RNA Sequencing
Source: MDPI journal article supplement (doi:10.3390/ijms23073419), 2022-03-22
Supplement: s1 [file s1]

# An efficient and universal protoplast isolation protocol suitable for transient gene expression analysis and single-cell RNA sequencing

Juan-Juan Wang, Yang Wang, Tian-Feng Lü, Xia Yang, Jing Liu, Yang Dong and Yin-Zheng Wang

## Supplemental Method

### Reagent setup and Step-by-step method details

#### Experimental considerations

1. Before starting this protocol, please ensure that instruments and equipment required for protoplast extraction at 25 °C are available as these steps are crucial for the successful protoplast isolation.
2. It should be noted that this protocol is set up and optimized for *Chirita pumila*, but may also be applicable to other non-model organisms.

#### 1. Reagent setup

##### a. Prepare 2 M KCl (10 mL)

Dissolve 1.491 g KCl with 8 mL double distilled water (ddH<sub>2</sub>O), and then fill up to 10 mL with ddH<sub>2</sub>O. Autoclave at 121 °C for 20 mins. Store at room temperature (25 °C) up to 4 weeks.

##### b. Prepare 1 M CaCl<sub>2</sub> (20 mL)

Dissolve 2.22 g CaCl<sub>2</sub> with 15 mL ddH<sub>2</sub>O, and then fill up to 20 mL with ddH<sub>2</sub>O. Sterilize using 0.22 µm sterile membrane filters in a laminar hood. Store at room temperature (25 °C) up to 4 weeks.

**Note:** Calcium chloride can be sterilized using 0.22 µm filters or autoclaving at 121 °C for 20 mins.

##### c. Prepare 2 M MgCl<sub>2</sub> (20 mL)

Dissolve 8.132 g MgCl<sub>2</sub>·6H<sub>2</sub>O in 15 mL ddH<sub>2</sub>O, and then fill up to 20 mL with ddH<sub>2</sub>O. Sterilize with 0.22 µm membrane filter. Store at room temperature (25 °C) up to 4 weeks.

##### d. Prepare 0.5 M NaCl (100 mL)

Dissolve 2.922 g NaCl in 80 mL ddH<sub>2</sub>O, and then fill up to 100 mL with ddH<sub>2</sub>O. Autoclave at 121 °C for 20 mins. Store at room temperature (25 °C) up to 4 weeks.

e. Prepare 0.2 M 2-(N-Morpholino) ethanesulfonic acid (MES) (100 mL)

Dissolve 4.264 g with 80 mL ddH<sub>2</sub>O, adjust pH to 5.7 with KOH and fill up to 100 mL with ddH<sub>2</sub>O. Sterilize using 0.22 µm filters in a laminar hood. Aliquot (10 mL for each) and store at 4 °C for up to 2 weeks.

f. Prepare 0.8 M mannitol (100 mL)

Dissolve 14.576 g mannitol with 80 mL ddH<sub>2</sub>O, and then fill up to 100 mL with ddH<sub>2</sub>O. Sterilize using 0.22 µm filters in a laminar hood. Store at 4 °C for up to 4 weeks.

**Note:** Mannitol is very prone to be contaminated by bacterial and mold, please conduct this step in a laminar hood. Aliquot (10 mL for each) and store at 4 °C for up to one month.

g. Prepare 5% Bovine serum albumin (BSA)

Dissolve 0.5 g BSA in 10 mL ddH<sub>2</sub>O. Sterilize using 0.22 µm filters in a laminar hood. Aliquot (1 mL for each) and store at -20 °C up to 4 weeks.

**Note:** Avoid repeated freezing and thawing. The BSA buffer can be stored at 4 °C for up to one week.

## ● Protoplast isolation related buffers

### ✧ Prepare the Pretreatment Buffer (10 mL)

Mix 100 µL 2 M KCl, 100 µL 1 M CaCl<sub>2</sub>, 1 mL 0.2 M MES, 7.5 mL 0.8 M mannitol and 200 µL 5 % BSA in 10 mL sterilized water.

| Reagent               | Final concentration | Amount      |
|-----------------------|---------------------|-------------|
| 2 M KCl               | 20 mM               | 100 µL      |
| 0.2 M MES             | 20 mM               | 1 mL        |
| 0.8 M mannitol        | 0.6 M               | 7.5 mL      |
| 1 M CaCl <sub>2</sub> | 10 mM               | 100 µL      |
| 5% BSA                | 0.1 %               | 200 µL      |
| ddH <sub>2</sub> O    |                     | up to 10 mL |

**Note:** Prepare fresh pretreatment buffer before each experiment.

### ✧ Prepare Enzyme Buffer I (100 mL)

Dissolve 1.0 g cellulase R10, 0.5 g macerozyme R10, 0.5 g pectinase in 8 mL ddH<sub>2</sub>O, add 1 mL 2 M KCl, 10 mL 0.2 M MES and 75 mL 0.8 M mannitol to the mixture in the order specified. Heat up the mixture to 55 °C for 10 mins in a water bath to deactivate the proteases and cool down the mixture to room temperature. Add 1 mL 1 M CaCl<sub>2</sub> and 2 mL 5 % BSA into the buffer and mix gently. Add ddH<sub>2</sub>O up to 100

mL.

| Reagent                                                            | Final concentration | Amount       |
|--------------------------------------------------------------------|---------------------|--------------|
| cellulase R10                                                      | 1 %                 | 1 g          |
| macerozyme R10                                                     | 0.5 %               | 0.5 g        |
| pectinase                                                          | 0.5 %               | 0.5 g        |
| ddH <sub>2</sub> O                                                 |                     | 8 mL         |
| 2 M KCl                                                            | 20 mM               | 1 mL         |
| 0.2 M MES                                                          | 20 mM               | 10 mL        |
| 0.8 M mannitol                                                     | 0.6 M               | 75 mL        |
| 55 °C for 10 mins in water bath then cool down to room temperature |                     |              |
| 1 M CaCl <sub>2</sub>                                              | 10 mM               | 1 mL         |
| 5% BSA                                                             | 0.1 %               | 2 mL         |
| ddH <sub>2</sub> O                                                 |                     | up to 100 mL |

**Note:** Sterilize the buffer using 0.22 µm filters in a laminar hood. Aliquot (10 mL for each) and store at -20 °C. Thaw on the ice and mix thoroughly before use.

✧ **Prepare Enzyme Buffer II (100 mL)**

Dissolve 1.2 g cellulase R10, 0.4 g macerozyme R10 with 8 mL ddH<sub>2</sub>O, add 1 mL 2 M KCl, 10 mL 0.2 M MES, 75 mL 0.8 M mannitol to the mixture. Heat up the mixture to 55 °C for 10 mins in a water bath to deactivate the proteases and cool down the mixture to room temperature. Add 1 mL 1 M CaCl<sub>2</sub> and 2 mL 5 % BSA into the buffer and mix gently. Add ddH<sub>2</sub>O up to 100 mL.

| Reagent                                                            | Final concentration | Amount       |
|--------------------------------------------------------------------|---------------------|--------------|
| cellulase R10                                                      | 1.2 %               | 1.2 g        |
| macerozyme R10                                                     | 0.4 %               | 0.4 g        |
| ddH <sub>2</sub> O                                                 |                     | 8 mL         |
| 2 M KCl                                                            | 20 mM               | 1 mL         |
| 0.2 M MES                                                          | 20 mM               | 10 mL        |
| 0.8 M mannitol                                                     | 0.6 M               | 75 mL        |
| 55 °C for 10 mins in water bath then cool down to room temperature |                     |              |
| 1 M CaCl <sub>2</sub>                                              | 10 mM               | 1 mL         |
| 5% BSA                                                             | 0.1 %               | 2 mL         |
| ddH <sub>2</sub> O                                                 |                     | up to 100 mL |

**Note:** Sterilize the buffer using 0.22 µm filters in a laminar hood. Aliquot (10 mL for each) and store at -20 °C. Thaw on the ice and mix thoroughly before use.

✧ **Prepare W5 Buffer (50 mL)**

Mix 0.125 mL 2 M KCl, 6.25 mL 1 M CaCl<sub>2</sub>, 15.4 mL 0.5 M NaCl, 0.5 mL 0.2 M MES with ddH<sub>2</sub>O and then fill up to 50 mL with ddH<sub>2</sub>O. Store at room temperature (25 °C) up to 2 weeks.

| Reagent               | Final concentration | Amount      |
|-----------------------|---------------------|-------------|
| 2 M KCl               | 5 mM                | 0.125 mL    |
| 1 M CaCl <sub>2</sub> | 125 mM              | 6.25 mL     |
| 0.5 M NaCl            | 154 mM              | 15.4 mL     |
| 0.2 M MES             | 2 mM                | 0.5 mL      |
| ddH <sub>2</sub> O    |                     | up to 50 mL |

**Note:** W5 solution should be freshly prepared right before the experiment.

● **Protoplast transformation related buffers**

✧ **Prepare MMG Buffer (5 mL)**

Mix 3.75 mL 0.8 M mannitol, 37.5 µL 2 M MgCl<sub>2</sub>, 0.1 mL 0.2 M MES with ddH<sub>2</sub>O up to 5 mL. Prepare and mix well this solution before use.

| Reagent               | Final concentration | Amount     |
|-----------------------|---------------------|------------|
| 0.8 M mannitol        | 0.6 M               | 3.75 mL    |
| 2 M MgCl <sub>2</sub> | 15 mM               | 37.5 µL    |
| 0.2 M MES             | 4 mM                | 0.1 mL     |
| ddH <sub>2</sub> O    |                     | up to 5 mL |

**Note:** MMG buffer should be freshly prepared right before the experiment.

✧ **Prepare 40% PEG solution (1 mL)**

Dissolve 0.4 g PEG4000 with 250 µL 0.8 M mannitol and 200 µL 1 M CaCl<sub>2</sub> and add ddH<sub>2</sub>O up to 1000 µL. Mix thoroughly by vortexing.

| Reagent               | Final concentration | Amount        |
|-----------------------|---------------------|---------------|
| PEG4000               | 40% (m/v)           | 0.4 g         |
| 0.8 M mannitol        | 0.2 M               | 250 µL        |
| 1 M CaCl <sub>2</sub> | 0.2 M               | 200 µL        |
| ddH <sub>2</sub> O    |                     | up to 1000 µL |

**Note:** Prepare this solution at least 30 mins before transformation. Be sure that PEG4000 is completely dissolved without any bubbles.

## ***2. Step-by-step method details***

### **2.1. Protoplast isolation**

TIMING: ~4.5-5 hrs

1. Add 5 mL pretreatment buffer into a 60 mm×15 mm cell culture petri dish.
2. Cut 8-10 young and healthy samples (flowers, tuberous roots, or gonophores or other young tissues) from the plant using a scissor, put the samples in the pretreatment buffer.

**Critical:** The developmental stage of the sample is crucial for a successful protoplast isolation experiment.

3. Carefully fold the sample (for leaves and flower lips) and slice the sample into ~ 0.5-1 mm strips using sharp surgical blade in the pretreatment buffer.

**Critical:** Always slice the sample using a sharp surgical blade from one side to the other. Cutting the sample using scissors will crush the cells at the cutting edge and in turn generate excessive cell rupture. Too much materials also often leads to insufficient enzymatic digestion. To our experience, 10 leaf blade (1 cm<sup>2</sup> each) reach the maximum for 5 mL digestion buffer.

4. Gently submerge the samples into the pretreatment buffer using a tip, penetrate the sample under vacuum for 10 mins.

**Critical:** This step is performed under vacuum ~100 mbar. Release the vacuum slowly to avoid any damage to plant cells.

5. Discard the pretreatment buffer by pipetting gently.
6. Add 5 mL Enzyme buffer I into the petri dish and gently submerge the sample using a tip.

**Critical:** Make sure all the samples are submerged by the enzyme buffer, otherwise this will result in poor protoplast yield.

7. Fix the petri dish on a shaker at a speed of 40 rpm and 26 °C for 3 hrs.

**Critical:** To our experience, an excess of the protoplasts would be recovered from the tissues after 3 hrs digestion. Examine the amount of protoplast under the microscope after 3-hour digestion. Proceed to the second-round digestion if the samples were partially digested or only a small number of protoplasts were recovered.

8. Collect the protoplast and partially sample by centrifuging at 25 °C, 200 rcf (g) for 3 mins, discard the supernatant completely by gentle pipetting and resuspend the sample with 5 mL Enzyme buffer II.

**Critical:** The protoplasts are very fragile, please centrifuge the sample with the speed lower than 250 rcf (g) and resuspend the protoplast very gently using blunt tips.

9. Fix the petri dish on a shaker at a speed of 40 rpm and 26 °C for 90 mins.

**Note:** To our experience, a large number of protoplasts will be released after 1-hour digestion.

10. Add 5 mL W5 buffer to the protoplast mixture to stop the reaction.

**Critical:** The W5 buffer should be added through the edge of the petri dish and gently mix the sample by soft shaking. Avoid any violent movement of the solutions.

11. Wash the 40  $\mu$ m nylon cell strainer with 5 mL W5 buffer twice, put the nylon cell strainer on a 50 mL falcon tube.

12. Carefully transfer the protoplast mixture onto the cell strainer using blunt tips to filter the protoplast.

**Critical:** Please use blunt tips as the protoplasts are very fragile.

13. Wash the nylon cell strainer with 2 mL W5 Buffer.

**Note:** Rinse the digested tissues on the nylon cell strainer with W5 buffer can yield more protoplasts, but more cell debris will be recovered as well.

14. Wash a new 40  $\mu$ m nylon cell strainer with 5 mL W5 buffer twice, put the nylon cell strainer on a new 50 mL falcon tube.

15. Carefully transfer the protoplasts from step 13 onto the cell strainer using blunt tips to filter the protoplast again.

**Critical:** Please use blunt tips as the protoplast are very fragile.

16. Collect the protoplast by centrifuging at 25 °C, 200 rcf (g) for 3 mins, remove the supernatant completely by gentle pipetting without disturbing the pellet.

**Critical:** Please centrifuge the protoplast with the speed lower than 250 rcf (g).

17. Resuspend the protoplast with 2 mL W5 buffer by very soft pipetting with a blunt tip.

**Critical:** Please conduct this step in extremely gentle action and avoid any violent movement of the protoplast.

18. Transfer the protoplast into a 2.0 mL Eppendorf tube.

**Critical:** Please use blunt tips as the protoplast are very fragile.

19. Place the protoplast on ice for 20 mins to sediment the cells.

**Note:** To our experience, most of the protoplasts will be sedimented to the bottom of the tube while the cell debris will remain in the supernatant.

20. Remove the supernatant gently and resuspend the protoplasts with 200  $\mu$ L W5 buffer.

**Note:** To our experience, resuspension of the protoplast to a final volume of 200  $\mu\text{L}$  will reach a concentration around  $1 \times 10^9$  cells/mL. Dilute the protoplast to an appropriate concentration according to the downstream experiment requirements.

**Critical:** Please conduct this step on the ice and in extremely gentle action and avoid any violent movement of the protoplast.

21. Place the protoplast on ice and proceed to the experiment.

## **2.2. Protoplast quality check (Trypan blue/rhodamine 123 staining/fluorescein diacetate staining, optional)**

TIMING:  $\sim 10$  mins

22. Transfer 20  $\mu\text{L}$  protoplasts to a PCR tube, add 2  $\mu\text{L}$  trypan blue stock solution (0.4%), or 0.2  $\mu\text{L}$  rhodamine 123 solution (100  $\mu\text{M}$ ) to a final concentration of 1  $\mu\text{M}$  or 0.2  $\mu\text{L}$  fluorescein diacetate (FDA, 10 mg/mL) stock solution to a final concentration of 0.1 mg/L, mix very gently.

**Critical:** Please conduct this step gently and avoid any violent movement of the protoplast.

23. Load 10  $\mu\text{L}$  protoplast onto a haemocytometer and examine the cell activity under Zeiss LSM-510 microscope.

**Note:** The active cells are indicated by round cells without any blue staining and green-fluorescence labeled while using trypan blue staining and fluorescein diacetate (FDA) staining, respectively.

24. Count the number of blue staining protoplasts and the number of total protoplasts.

**Note:** % viable protoplasts =  $[1.00 - (\text{Number of blue protoplasts} / \text{Number of total protoplasts})] \times 100$ , or  $=(\text{fluorescent protoplast number in view} / \text{protoplast total number in view}) \times 100\%$

## **2.3. Protoplast transformation**

TIMING:  $\sim 45$  mins

25. Collect the protoplasts from step 21 by centrifuging at 4  $^{\circ}\text{C}$ , 200 rcf (g) for 3 mins, remove the supernatant completely by gentle pipetting without disturbing the pellet.

**Critical:** Please be aware the temperature for centrifuge is 4  $^{\circ}\text{C}$  and make sure that the speed is lower than 250 rcf (g).

26. Resuspend the protoplasts with MMG buffer to the concentration of  $1 \times 10^7$  cells/mL on the ice.

**Critical:** Please conduct this step in an extremely gentle action and avoid any violent movement of the protoplast.

27. Mix 10  $\mu\text{L}$  plasmids (1-2  $\mu\text{g}/\mu\text{L}$ ) in an appropriate ratio thoroughly in a 2.0 mL Eppendorf tube.

**Note:** For transient expression assays, we recommend the plasmid ratio of regulatory effectors, reporter and a control reporter in 5:4:1.

**Critical:** Always prepare the plasmid by Midi prep (Qiagen, 12143) as the plasmid quality is critical for a successful transient expression experiment.

28. Add 100  $\mu\text{L}$  protoplasts prepared from step 26, mix gently with a blunt tip.

**Critical:** Please conduct this step in extremely gentle action and avoid any violent movement of the protoplasts.

29. Add 110  $\mu\text{L}$  PEG solution to the DNA-protoplasts, mix the mixture by slowly inverting the tubes several times.

**Note:** The 40% PEG solution should be prepared freshly right before the experiment, ideally between step 19 and 20.

**Critical:** Please conduct this step in a slow and soft action and avoid any violent movement of the protoplasts.

30. Heat shock the DNA-protoplasts-PEG mixture at 42  $^{\circ}\text{C}$  in a water bath for 3 mins.

**Note:** To our experience, heat shock in the water bath generates better results than in the dry bath.

31. Immediately transfer the tubes in the ice bath and incubate for 10 mins.

32. Add 440  $\mu\text{L}$  W5 buffer to the transformation mixture gently, mix the sample by slowly inverting the tube.

33. Collect the protoplasts from step 32 by centrifuging at 25  $^{\circ}\text{C}$ , 200 rcf (g) for 60 seconds (secs), remove the supernatant completely by careful pipetting without disturbing the pellet.

**Critical:** Please be aware the temperature for centrifuge is 25  $^{\circ}\text{C}$  and make sure that the speed is lower than 250 rcf (g).

34. Resuspend the protoplasts with 500  $\mu\text{L}$  W5 buffer by very soft pipetting with a blunt tip.

**Critical:** Please conduct this step in extremely gentle action and avoid any violent movement of the protoplasts.

35. Collect the protoplasts by centrifuging at 25  $^{\circ}\text{C}$ , 200 rcf (g) for 60 secs, remove the supernatant completely by careful pipetting without disturbing the pellet.



**Critical:** Please make sure that the speed is lower than 250 rcf (g).

36. Resuspend the protoplasts with 1 mL W5 buffer by very soft pipetting with a blunt tip.

**Critical:** Please conduct this step in extremely gentle action and avoid any violent movement of the protoplasts.

37. Coat the wells in 24-well tissue culture plates with 5% BSA.

**Note:** Coating 5% BSA in the well is necessary to prevent the protoplasts sticking on the surface.

38. Transfer the cell suspension into the tissue culture plate and culture the protoplasts at 26 °C for 16-20 hrs under a light intensity of  $\sim 11 \mu\text{mol}/\text{m}^2/\text{s}$ .

## ***2.4 Troubleshooting***

### **Problem 1: Low protoplast yield**

- The developmental stages of the plant sample is key to an efficient protoplast release process. Try to choose the samples that are ongoing active growth.
- Slice the samples as finely as you can.
- Make sure the plant materials were fully penetrated by the pre-treatment buffer, and extend the vacuum time to 15 mins in step 4 if necessary.
- Apply vacuum infiltration to step 6 for 10 mins.
- Extend the phase I digestion to 4 hrs if necessary.

### **Problem 2: Poor cell viability rate**

- Check all the buffers and make sure the key buffers are sterile and made fresh.
- Try to finish the protoplast extraction process in 6 hrs.
- If you can acquire enough protoplasts after the first round of digestion, then directly proceed to the following steps without the treatment of enzyme buffer II.
- Try to quantify the cell viability rate immediately after trypan blue staining. Longer staining time will decrease the viability rate.

### **Problem 3: A substantial amount of cell debris was found in the protoplasts**

- Always slice the sample with the sharp surgical blade and avoid any kind of crushing of the samples.
- Always use blunt tips and resuspend the cells with very gently as indicated in the protocol.

- Make sure the centrifuge speed is below 250 rcf (g).
- Sediment the protoplasts in step 19 twice if necessary.

**Problem 4:** Low transformation rate

- Try to prepare high-quality plasmid following the tips for the troubleshooting to problem 2.
- Please be aware that the temperature for some centrifuge steps is 4 °C, which is key to a successful transformation experiment.
- The PEG solution should be freshly prepared before use, and try to dissolve PEG completely by vortexing.
- Try to place the protoplasts on an ice-water bath immediately after heat-shock without any disturbance.
- The plasmid quality is an influential factor to a successful transformation experiment, and please always use Midi/Maxi-Prep plasmid kit for plasmid preparation.
- The transformed protoplasts should be cultured at 26 °C under low light intensity ( $\sim 11 \mu\text{mol}/\text{m}^2/\text{s}$ ).
- The culture time is 16-24 hrs, and culture time longer than 24 hrs will significantly decrease the proportion of cells showing GFP signals.

## 2.5 Key resources Table

| REAGENT or RESOURCE                      | SOURCE            | IDENTIFIER |
|------------------------------------------|-------------------|------------|
| Bacterial Strains                        |                   |            |
| Trans1-T1 Phage Chemically Comptent Cell | Transgen Bio Tech | CD501-03   |
| Plant Samples                            |                   |            |
| <i>C. pumila</i> (WT)                    | This study        | N/A        |
| <i>Aristolochia fimbriata</i>            | This study        | N/A        |
| <i>Aquilegia ecalcarata</i>              | This study        | N/A        |
| <i>Physalis floridana</i>                | This study        | N/A        |
| <i>Petrocosmea sinensis</i>              | This study        | N/A        |
| <i>Glycine max</i>                       | This study        | N/A        |
| <i>Rehmannia glutinosa</i>               | This study        | N/A        |
| <i>Lycopersicum esculentum</i>           | This study        | N/A        |
| <i>Arachis hypogaea</i>                  | This study        | N/A        |
| Plasmids and Recombinant DNA             |                   |            |
| pHBT-sGFP(S65T)-NOS                      | [19]              | N/A        |
| p35Smini:GFP                             | This study        | N/A        |
| p4×ABRE-mini:GFP                         | This study        | N/A        |
| p4×mABRE-mini:GFP                        | This study        | N/A        |
| p35S:AREB1                               | This study        | N/A        |
| p35S:GUS                                 | This study        | N/A        |
| Chemicals                                |                   |            |
| KCl                                      | Sigma-Aldrich     | V900068    |
| CaCl <sub>2</sub>                        | Sigma-Aldrich     | C5670      |
| MgCl <sub>2</sub> ·6H <sub>2</sub> O     | Sigma-Aldrich     | M2670      |
| NaCl                                     | Sigma-Aldrich     | S5886      |
| MES                                      | Sigma-Aldrich     | M3671      |
| Mannitol                                 | Solarbio          | M8140      |
| BSA                                      | Genview           | FA016      |
| PEG4000                                  | Sigma-Aldrich     | 81240      |
| Cellulase R-10                           | Yakult            | AOV0105    |
| Pectolase Y-23                           | BioDee            | DEC002     |
| Macerozyme R-10                          | Yakult            | AOV0096    |
| Other Commercial Products                |                   |            |
| Trypan Blue Stain (0.4%)                 | Invitrogen        | 15250061   |
| Fluorescein diacetate (FDA) solution     | Coolaber          | PPT5351    |
| Rhodamine 123 (rhd 123) solution         | Coolaber          | SL7132     |
| TIANGel Purification Kit                 | Tiagen            | DP219-02   |
| TIANprep Rapid Mini Plasmid Kit          | Tiagen            | DP105-02   |
| QIAGEN Plasmid Midi Kit                  | Qiagen            | 12143      |
| QIAGEN Plasmid Maxi Kit                  | Qiagen            | 12162      |
| In-Fusion HD Cloning Kit                 | Takara            | 639649     |

|                                             |                 |             |
|---------------------------------------------|-----------------|-------------|
| KOD-Plus-Neo DNA Polymerase                 | Toyobo          | KOD-401     |
| T4 DNA Ligase                               | Takara          | 2011A       |
| HindIII-HF                                  | NEB             | R3104V      |
| SacI-HF                                     | NEB             | R3156V      |
| BamHI-HF                                    | NEB             | R3136V      |
| PstI-HF                                     | NEB             | R3140V      |
| LB liquid Medium                            | Coolaber        | PM0010L     |
| LB solid medium                             | Coolaber        | PM0020      |
| Murashige & Skoog (MS) Basal Medium         | Coolaber        | PM1011      |
| Kanamycin                                   | Inalco          | 1758-9316   |
| Ampicillin sodium                           | Solarbio        | A8180       |
| SV Total RNA Isolation System               | Promega         | Z3100       |
| RevertAid First Strand cDNA Synthesis Kit   | Thermo          | K1622       |
| TB Green Premix Ex Taq II (Tli RNaseH Plus) | Takara          | RR820A      |
| <hr/>                                       |                 |             |
| Others                                      |                 |             |
| 0.22 µm sterile filter                      | Merck Millipore | SLGPR33RB   |
| 40 µm nylon cell strainer                   | Falcon          | 352340      |
| 60 mm ×15 mm tissue culture dish            | Corning         | 430196      |
| 50 mL centrifuge Falcon tube                | Corning         | 430828      |
| 2.0 mL DNA LoBind Eppendorf Tube            | Eppendorf       | 022431048   |
| Haemocytometer                              | Easybio         | BE6138      |
| Gelzan                                      | Sigma-Aldrich   | 71010-52-1  |
| Cell counting plate                         | Easybio         | BE6138      |
| 24 well cell culture plate                  | Corning         | 3524        |
| Glass slide                                 | Sailboat        | 7105        |
| Glass cover slide                           | Easybio         | 10212424C   |
| Vacuum concentrator (minimum to 100 mbar)   | ScanVac         | ScanSpeed32 |
| Low-temperature centrifugate                | eppendorf       | 5427 R      |
| Orbital shaker                              | HYCX            | CS-100      |
